# Supplementary material for: Growth and development of succulent mixtures for extensive green roofs in a Mediterranean climate
Source: PLoS One. 2022 Jun 3;17(6):e0269446. doi: 10.1371/journal.pone.0269446 (PMC9165813; doi:10.1371/journal.pone.0269446)
Supplement: S6 Table — (XLSX) [file pone.0269446.s007.xlsx]

## Sheet: Foglio1
table S6. Growth index
	Month	I BL	II BL	III BL
Sedum mixture	Feb	3.95	3.48	3.84
Sedum mixture	Mar	10.15	10.08	10.63
Sedum mixture	Apr	10.02	10.22	10.68
Sedum mixture	May	11.96	10.97	13.53
Sedum mixture	Jun	12.46	12.70	13.74
Sedum mixture	Jul	12.38	11.91	13.04
Sedum mixture	Aug	12.38	11.91	13.04
Sedum mixture	Sep	12.32	11.99	12.55
Sedum mixture	Oct	14.91	15.44	15.30
Sedum mixture	Nov	15.59	16.49	15.60
Aizoaceae mixture	Feb	14.24	14.10	11.29
Aizoaceae mixture	Mar	18.68	18.30	16.37
Aizoaceae mixture	Apr	18.69	18.25	16.95
Aizoaceae mixture	May	22.37	21.57	19.14
Aizoaceae mixture	Jun	19.67	21.56	19.30
Aizoaceae mixture	Jul	20.03	21.80	18.40
Aizoaceae mixture	Aug	20.25	22.19	18.44
Aizoaceae mixture	Sep	20.52	22.75	17.57
Aizoaceae mixture	Oct	24.51	23.57	22.62
Aizoaceae mixture	Nov	27.10	25.99	26.02
Aizoaceae mixture	Oct	24.51	23.57	22.62
Aizoaceae mixture	Nov	27.10	25.99	26.02
